# Supplementary material
Source: publisher figshare collection journal article supplement (https://gsajournals.figshare.com/ndownloader/files/12878732)
Supplement: Supplementary file 1 [file 12878732]

## Sheet: Sheet1
Table S2. Mean coverage and standard deviation, chromosome by chromosome (>0.5 Allele Frequency, Coverage>8, <100)
	ten	vns
Chr1	18.13±8.19	13.97±6.27
Chr2	20.17±7.54	14.20±6.31
Chr3	20.81±8.69	14.04±6.09
Chr4	20.17±7.50	14.38±6.63
Chr5	19.87±7.89	14.21±6.58
Chr6	20.06±7.79	14.27±6.76
Chr7	20.93±9.25	14.05±6.20
Chr8	20.40±8.51	14.10±6.38
Chr9	20.50±8.12	13.95±5.95
Chr10	20.44±8.17	14.15±6.20
